# Supplementary material for: Relevance of QuantiFERON-TB Gold Plus and Heparin-Binding Hemagglutinin Interferon-γ Release Assays for Monitoring of Pulmonary Tuberculosis Clearance: A Multicentered Study
Source: Front Immunol. 2021 Feb 2;11:616450. doi: 10.3389/fimmu.2020.616450 (PMC7885528; doi:10.3389/fimmu.2020.616450)
Supplement: Supplementary file 1 [file DataSheet_1.xlsx]

## Sheet: HINTT_QFTP_repository
ID	NIL_T0	NIL_T1	NIL_T2	TB1_T0	TB1_T1	TB1_T2	TB2_T0	TB2_T1	TB2_T2	MIT_T0	MIT_T1	MIT_T2	HBHA_T0	HBHA_T1	HBHA_T2	STRAIN	COUNTRY	LEUCOCYTES_T0	LEUCOCYTES_T1	LEUCOCYTES_T2	LYMPHOCYTES_T0	LYMPHOCYTES_T1	LYMPHOCYTES_T2	NEUTRO_T0	NEUTRO_T1	NEUTRO_T2	CULTURE_T0	CULTURE_T1	CULTURE_T2
01DRGE	0.03	0.04	0.03	0.19	0.35	1.73	0.27	0.16	1.47	10	10	10	0.86	0.51	8.75	DR	GEO	15700	12200	7100	12	18	40	84	76	57	1	0	0
01DSB	0.47	0.1	0.16	1.04	1.26	1.62	1.12	1.44	1.63	10	10	10	1.28	0.95	10	DS	BD	9000	8800	6600	15	30	28	80	65	68	1	0	0
01DSGE	0.26	1.24	0.24	2.01	4.69	1.48	1.28	8.93	1.8	10	10	10	6.84	10	10	DS	GEO	8200	7000	4300	25	30	36	70	63	59	1	0	0
01DSLA	0.38	0.204	0.187	0.51	0.24	1.537	0.996	0.24	1.278	10	10	10	0.589	0.207	0.727	DS	LB	15800	13300	7020	11.4	14.4	33.1	80.8	79.9	58.3	1	0	NA
01DSLT	0.255	0.141	0.109	2.593	6.055	3.535	2.301	4.722	6.045	10	10	10	0.323	0.276	0.222	DS	LB	12200	7970	8340	12.9	21	20.9	72.1	67	69.1	1	0	0
01DSP	0.49	0.378	0.364	1.09	1.409	0.455	0.79	1.855	0.322	10	10	10	0.55	1.901	1.689	DS	PR	11110	7300	8200	16	21	24	79	72	55	1	0	0
02DRGE	0.07	0.04	0.12	0.13	0.15	0.3	0.18	0.15	0.24	10	10	10	0.71	8.46	3.04	DR	GEO	8200	72000	6800	19	34	34	78	59	60	1	1	0
02DSB	0.25	0.66	0.68	0.57	0.86	1.26	0.54	0.72	1.66	10	10	10	0.46	0.42	10	DS	BD	7000	9500	7000	25	25	28	70	70	68	1	0	0
02DSGE	0.34	0.02	0.72	1.26	1.69	0.8	3.15	2.6	0.04	10	10	10	10	6.42	2.81	DS	GEO	5400	5400	5800	35	35	26	61	61	68	1	0	0
02DSLT	0.117	0.104	0.104	0.858	0.687	0.449	0.558	0.803	0.52	4.236	10	10	0.104	0.701	1.4	DS	LB	12700	7230	6670	14	28.1	28.4	76.2	58.8	55.8	1	0	0
02DSP	3.063	0.455	0.322	10	10	1.901	10	9.842	2.267	10	10	10	0.609	0.863	0.694	DS	PR	8860	9880	8530	10	22	30	89	75	9	1	0	0
03DRB	0.17	0.04	0.2	6.91	0.41	4.82	8.4	1.04	4.81	10	3.8	10	0.32	0.62	10	DR	BD	9500	6500	6000	32	20	30	64	75	65	1	0	0
03DRGE	0.03	0.08	0.03	0.77	0.53	0.7	0.36	0.29	0.39	10	10	10	0.67	0.44	1.28	DR	GEO	11300	930	6400	15	24	40	81	70	54	1	NA	0
03DSB	0.65	0.81	0.93	5.67	10	10	8.05	10	10	10	10	10	1.26	2.07	10	DS	BD	9000	6000	7000	14	35	34	78	60	60	1	0	0
03DSGE	0.51	0.05	0.07	8.58	0.99	3.53	8.3	1.63	5.27	10	10	10	2.94	0.3	0.44	DS	GEO	9800	9000	11800	28	17	26	67	77	70	1	0	0
03DSLT	0.843	0.141	0.125	2.108	1.746	0.85	2.314	1.06	0.992	5.474	10	9.627	0.906	2.099	0.486	DS	LB	5710	4920	5680	19.8	25.6	25.1	70.4	63.1	66.5	1	NA	NA
03DSM	0.44	0.239	0.312	4.28	0.244	8.006	3.74	0.254	8.802	10	10	0.965	0.35	1.421	0.27	DS	MG	5160	3940	3300	35.5	50.3	46.6	44	27.9	36	1	NA	0
03DSP	0.22	0.269	0.266	0.62	0.594	0.894	0.54	0.654	1.432	10	10	10	0.22	0.232	0.416	DS	PR	12030	10360	9490	10	11	18	86	84	69	1	0	0
04DRGE	0.46	0.07	0.29	2.23	0.1	1.76	1.97	0.12	2.12	10	10	10	7.52	0.09	10	DR	GEO	9400	10300	9200	26	18	35	68	79	59	1	0	0
04DSGE	0.97	0.04	0.43	5.21	5.16	8.59	4.27	3.75	10	10	10	10	0.72	1.21	5.08	DS	GEO	8400	4700	4700	14	27	27	80	70	63	1	0	0
04DSLT	1.369	1.278	1.309	4.37	3.231	4.25	3.777	2.811	5.32	10	10	10	0.4	1.27	1.301	DS	LB	8610	4440	3670	13.4	31	26.1	77.9	54.8	60.3	1	0	0
04DSP	0.959	0.409	0.322	1.259	0.436	0.488	1.862	0.474	0.46	10	10	10	0.766	0.603	0.905	DS	PR	16280	9160	8970	17	16	29	81	82	67	1	0	0
05DRGE	0.12	0.05	0.05	1.12	0.58	0.29	0.98	0.67	0.3	10	10	10	0.66	0.05	0.56	DR	GEO	10200	16200	9000	13	15	17	80	80	75	1	0	0
05DRP	0.238	0.36	0.547	0.917	1.779	0.39	0.893	1.572	0.423	10	10	10	0.899	2.383	2.049	DR	PR	16190	8430	40420	16	43	37	82	50	55	1	0	0
05DSB	1.29	0.05	0.27	3.66	0.15	1.44	2.97	0.23	1.49	10	10	10	1.35	0.23	1.48	DS	BD	9500	7000	5000	32	28	35	62	68	60	1	0	0
05DSGE	0.23	0.09	0.04	5.27	4.81	1.39	5.38	2.6	1.9	10	10	10	0.24	0.48	1.09	DS	GEO	13200	9000	7800	16	18	35	78	78	60	1	0	0
05DSLT	0.201	0.962	0.189	0.433	2.497	0.788	0.335	2.669	0.77	8.112	10	10	0.189	5.914	4.145	DS	LB	7350	5310	3320	12.2	17.2	31.4	81.2	72.7	55.5	1	0	0
06DRGE	0.07	0.14	0.12	0.11	1.46	0.58	2.94	4.1	4.92	10	10	10	0.17	2.35	0.96	DR	GEO	12000	10300	6600	18	25	24	78	70	71	1	0	0
06DSB	0.23	0.22	0.33	0.56	1.07	1.23	0.8	1.03	1.14	10	10	10	0.25	0.28	8.7	DS	BD	13600	5000	7500	38	25	42	59	68	54	1	0	0
06DSGE	0.06	0.08	0.08	0.31	0.2	0.3	0.33	0.21	0.69	10	10	10	0.07	10	4.23	DS	GEO	14100	9900	7400	11	21	37	86	75	58	1	1	0
06DSP	0.629	0.477	0.2	1.179	0.504	1.584	1.957	0.57	6.667	10	10	10	0.619	0.291	1.46	DS	PR	7160	7570	6570	18	25	30	79	72	59	1	0	0
07DRGE	0.05	0.02	0.07	0.25	0.05	0.07	0.33	0.03	0.05	10	10	10	0.05	2.95	2.11	DR	GEO	6400	10200	4700	12	16	21	83	80	75	1	0	0
07DSGE	0.08	0.08	0.04	0.32	0.14	0.32	0.43	0.17	0.3	10	10	10	0.16	1.03	1.71	DS	GEO	15000	10000	8600	17	18	22	79	76	71	1	1	0
07DSLT	0.184	0.147	0.091	0.606	0.62	0.161	0.741	0.817	0.187	5.794	3.707	2.24	0.225	0.291	0.136	DS	LB	6210	8220	6800	17.2	23.8	15.1	69.9	65.2	74.6	1	0	0
08DSB	0.08	0.03	0.04	0.1	0.03	0.07	0.1	0.05	0.09	10	10	10	0.84	10	10	DS	BD	9500	6800	5800	18	23	20	78	70	71	1	0	0
08DSGE	0.13	0.07	0.07	0.7	0.09	0.06	0.43	0.15	0.06	10	10	10	0.33	0.55	1.83	DS	GEO	10100	8900	6700	18	28	36	75	64	59	1	1	0
08DSM	0.147	0.087	0.07	0.87	1.147	0.934	0.631	0.892	1.599	10	10	7.145	0.228	0.365	0.135	DS	MG	7370	5150	6400	17.8	34.6	31.4	64.6	43.3	42.7	1	NA	0
09DRB	0.13	0.05	0.09	0.1	0.08	0.09	0.16	0.1	0.1	2.46	10	10	0.1	3.06	5.2	DR	BD	9000	8000	15000	20	25	20	75	63	67	1	0	0
09DRGE	0.669	0.039	0.19	2.708	0.874	0.99	2.374	0.371	0.71	9.595	6.942	10	4.255	2.859	10	DR	GEO	6300	6700	3700	15	26	30	80	68	63	1	0	0
09DSB	0.09	0.15	6.81	2.27	10	10	2.08	10	10	10	10	10	0.57	0.97	10	DS	BD	7000	7000	5800	25	30	38	70	65	57	1	0	0
09DSGE	0.04	0.05	0.02	1.02	0.51	0.29	0.76	0.32	0.52	10	10	10	0.07	2.08	10	DS	GEO	6300	6000	4000	19	20	19	75	74	76	1	0	0
09DSM	0.135	0.264	0.162	0.104	0.209	0.198	0.107	0.188	0.21	7.789	8.147	4.09	0.131	0.451	0.582	DS	MG	8580	6010	5100	21.7	30.9	44	60.9	35	27	1	NA	0
10DRB	0.29	0.09	0.04	0.36	0.34	0.05	0.49	0.25	0.04	10	10	5.48	0.29	0.52	0.12	DR	BD	10400	8600	7200	37	28	27	68	67	53	1	0	0
10DRGE	0.038	0.034	0.031	0.107	0.056	0.068	0.044	0.074	0.09	9.314	10	8.361	0.21	9.896	1.784	DR	GEO	9000	6800	4300	12	20	21	85	76	73	1	0	0
10DSB	0.09	0.02	0.07	0.39	0.24	0.89	0.27	0.42	0.85	10	3.46	10	0.28	0.21	3.94	DS	BD	9000	8100	9500	20	28	20	75	68	75	1	0	0
10DSGE	0.04	0.03	0.21	0.08	0.08	0.19	0.11	0.08	0.17	10	10	10	0.13	0.15	10	DS	GEO	16700	11200	5600	15	20	34	82	77	60	1	NA	1
11DSB	0.07	0.1	0.29	0.6	0.69	10	1.78	2.12	10	10	10	10	0.11	0.41	5.92	DS	BD	10000	9500	5500	26	26	30	68	66	65	1	0	0
11DSGE	0.06	0.03	0.02	0.65	1.19	0.18	0.51	0.8	0.06	10	10	10	9.24	10	4.83	DS	GEO	7600	4100	4300	18	28	36	78	65	58	1	0	0
12DSGE	0.27	0.23	0.41	0.01	10	10	9.22	10	10	10	10	10	0.02	10	7.08	DS	GEO	11500	6700	4500	21	39	36	74	55	60	1	0	0
12DSM	0.12	0.046	0.037	0.13	0.057	0.049	0.23	0.057	0.054	0.07	10	10	0.23	0.077	0.067	DS	MG	10020	8220	6020	12.2	13.6	20.0	73.5	66.7	60.6	1	NA	0
12DSP	1.23	0.179	0.082	0.16	0.01	0.01	1.09	0.11	0.05	9.75	0.98	0.17	0.01	0.01	0.04	DS	PR	14880	16080	31890	11	11	7	88	87	91	1	0	0
14DRGE	0.174	0.094	1.87	2.725	0.616	8.2	2.516	0.74	5.01	8.455	8.481	10	0.284	0.188	2.84	DR	GEO	12100	13100	840	16	32	31	80	64	65	1	0	0
14DSB	0.15	0.07	0.08	0.21	0.45	0.96	0.21	0.45	1.59	10	10	0.95	0.19	1.35	3.45	DS	BD	10800	9500	6000	18	25	28	78	70	68	1	0	0
14DSGE	1.63	3.39	0.63	10	10	10	10	10	10	10	10	10	7.23	10	10	DS	GEO	5500	4000	4200	22	41	42	72	53	50	1	0	0
14DSM	0.244	0.35	0.076	8.893	7.329	9.435	8.511	5.537	0.01	10	8.024	9.267	1.597	0.892	0.287	DS	MG	3320	2870	3770	39.7	31.3	37.6	46.4	55.1	51.1	1	NA	0
15DSB	0.1	0.17	0.15	0.32	1.41	0.62	0.47	1.24	0.83	10	10	10	1.12	10	10	DS	BD	10000	9000	6000	26	34	28	70	60	68	1	0	0
16DSB	0.42	0.64	2.95	4.47	10	10	3.7	10	10	10	10	7.75	0.89	10	10	DS	BD	9000	8100	7000	20	28	30	75	68	65	1	1	0
16DSP	0.582	0.096	0.97	0.825	0.209	1.425	1.293	0.22	1.576	2.74	10	9.407	0.648	0.279	1.057	DS	PR	13130	7080	5830	17	27	20	82	68	79	1	0	0
17DRB	0.15	0.04	0.03	0.68	0.07	0.08	0.42	0.09	0.13	10	10	7.56	0.18	0.23	1.42	DR	BD	13700	10400	6400	30	24	35	62	57	48	1	0	0
17DSB	0.18	0.08	0.23	0.25	0.08	0.23	0.17	0.1	0.14	10	10	10	2.21	2.39	8.53	DS	BD	10500	8100	7500	19	25	25	76	70	70	1	0	0
18DRB	0.34	0.25	0.11	0.82	1.42	0.46	1.91	5.73	1.7	10	10	10	0.65	2.03	10	DR	BD	7800	9700	10100	18	18	25	71	59	66	1	0	0
18DSB	0.09	0.5	1.35	3.46	2.38	2.67	4.04	2.47	4.19	10	10	10	1.67	0.63	10	DS	BD	8800	8800	12300	19	28	20	75	68	70	1	0	0
18DSM	0.248	0.259	0.406	0.46	0.229	0.889	0.583	0.305	1.276	10	10	1.522	0.306	0.279	0.201	DS	MG	13230	9550	5120	9.5	16.9	25.6	78.6	72.6	61.1	1	NA	0
19DSB	0.11	0.12	0.09	1.73	1.02	0.25	1.35	4.51	0.19	10	10	10	0.24	1.01	0.25	DS	BD	8800	8700	11700	30	43	30	65	53	65	1	0	0
19DSGE	0.27	0.119	0.03	0.67	3.607	10	0.6	3.138	2.78	10	10	10	4.11	10	10	DS	GEO	6000	3100	4100	14	38	28	83	56	66	1	0	0
19DSM	0.478	0.526	1.387	1.488	1.646	4.25	1.127	2.009	4.894	10	10	10	0.349	0.917	1.237	DS	MG	8040	6010	5140	17.7	17.5	30.8	68.6	67.4	51.8	1	NA	0
20DRB	0.62	0.11	0.31	9.98	3.9	7.67	9.47	4.32	10	10	6.39	10	0.53	0.12	3.43	DR	BD	10900	10200	8500	27	28	23	66	65	68	1	0	0
20DSB	0.11	0.18	0.12	0.96	0.43	0.63	0.6	0.49	0.69	10	10	10	0.13	1.25	7.42	DS	BD	9500	7500	10700	20	25	21	75	70	74	1	0	0
21DSB	0.92	0.55	0.34	1.61	4.3	5.11	2.35	5.75	10	10	10	10	0.66	1.18	0.08	DS	BD	15900	10000	5500	14	23	30	81	74	60	1	0	0
21DSGE	0.079	0.059	0.053	6.805	10	10	9.01	10	10	10	10	10	0.209	3.012	10	DS	GEO	11000	6500	5600	21	20	28	75	74	66	1	0	0
21DSM	0.211	0.25	0.098	0.34	0.62	0.47	0.37	0.33	0.1	10	10	10	0.707	6.48	0.162	DS	MG	4630	3100	2890	29.2	36.5	60	56.8	50.6	20	1	NA	0
21DSP	0.19	0.113	0.098	0.46	0.125	0.071	0.471	0.182	0.073	5.855	10	3.162	0.147	0.188	0.294	DS	PR	10060	8720	6940	22	25	25	73	70	68	1	0	0
22DSB	0.1	0.15	0.09	0.12	0.27	0.2	0.09	0.39	0.24	10	10	10	0.28	10	10	DS	BD	13500	7000	5800	18	38	35	78	58	57	1	0	0
22DSM	0.077	0.405	0.01	0.111	1.067	0.047	0.081	2.223	0.024	10	10	10	0.187	0.31	0.214	DS	MG	11360	4620	6960	21.1	58.0	48.6	61.3	26	35	1	NA	0
22DSP	0.109	0.149	0.18	0.43	0.43	0.265	0.51	0.51	0.29	10	10	10	0.275	0.275	0.728	DS	PR	8390	5300	6090	41	27	38	47	59	57	1	0	0
23DRB	0.04	0.02	0.06	0.34	0.55	0.59	0.31	0.54	0.59	10	10	9.8	0.14	0.26	3.5	DR	BD	11000	7000	18000	10	19	37	79	64	55	1	0	0
23DSB	0.18	0.18	0.47	7.92	1.92	5.69	8.77	8.77	6.19	10	10	10	10	10	10	DS	BD	6000	10400	7400	28	25	44	68	70	45	1	0	0
23DSGE	0.189	0.065	0.031	1.253	0.29	0.133	2.126	0.318	0.107	10	10	10	0.566	1.231	0.021	DS	GEO	5800	6000	3200	22	29	29	72	65	65	1	0	0
23DSP	0.045	0.151	0.065	0.361	1.014	0.496	0.306	0.651	0.394	10	10	10	0.091	0.249	0.154	DS	PR	9780	6330	8280	23	33	36	75	60	59	1	0	0
24DSB	0.19	0.67	2.07	2.19	3.06	5.1	2.76	1.58	4.57	10	10	10	1.34	1.14	6.44	DS	BD	7500	8200	9400	28	23	38	68	69	56	1	0	0
24DSGE	0.352	0.11	0.049	2.649	4.699	1.221	5.884	5.689	10	10	10	2.019	4.799	3.039	10	DS	GEO	12300	6800	6500	16	25	17	80	69	80	1	1	1
24DSM	0.069	0.133	0.047	0.783	1.459	3.664	0.694	1.893	10	10	10	10	0.68	1.911	10	DS	MG	11070	5520	5220	13.2	22.8	28.1	77.5	65.5	61.8	1	NA	0
25DRB	0.34	0.14	0.39	1.14	0.31	0.79	0.84	0.33	1.2	10	10	10	0.58	0.47	0.38	DR	BD	11800	12500	6900	14	17	32	80	76	54	1	0	0
25DSGE	0.042	0.063	0.029	8.634	1.85	0.198	9.916	2.107	0.276	10	10	10	10	2.541	10	DS	GEO	5500	4100	5800	30	30	26	66	64	66	1	0	0
25DSP	0.1	0.149	0.119	0.34	0.335	1.033	0.58	0.365	0.979	10	10	10	0.18	0.23	0.275	DS	PR	12040	12210	7850	28	19	14	61	75	66	1	0	0
26DRB	0.304	0.12	0.05	1.419	10	1.25	2.396	10	4.4	2.822	0.63	1.23	0.348	0.24	0.42	DR	BD	6500	4000	7700	24	21	37	65	68	50	1	0	0
26DSB	0.43	0.1	0.08	3.89	0.31	0.14	6.55	0.42	0.11	10	3.92	4.61	5.73	3.04	0.68	DS	BD	11100	5100	6200	18.4	31	34	72.6	54	53	1	0	0
26DSGE	0.437	2.352	0.019	2.557	10	0.025	4.437	10	0.117	10	10	10	0.372	6.845	0.048	DS	GEO	16400	7700	6000	18	31	43	76	65	53	1	0	0
26DSM	0.159	0.172	0.215	0.175	0.225	2.25	0.159	0.905	5.33	4.237	2.748	7.745	0.131	0.265	0.911	DS	MG	13210	4860	4380	5.0	31.8	45	94	61.8	42.2	1	NA	0
27DSGE	0.068	0.061	0.026	3.274	4.445	0.176	3.83	4.005	5.625	10	10	10	3.441	10	10	DS	GEO	10000	7700	6400	26	27	32	70	68	62	1	0	0
28DSGE	0.135	0.047	0.013	1.532	5.236	1.679	1.279	3.108	3.559	10	10	10	6.686	2.547	10	DS	GEO	9800	7600	5800	18	26	29	78	68	61	1	0	0
28DSP	0.17	0.17	0.2	0.644	0.405	0.26	0.693	0.28	0.325	10	9.854	10	0.23	0.728	1.234	DS	PR	11250	5970	6180	20	23	34	77	67	62	1	0	0
29DSM	0.6	0.367	0.184	0.609	0.568	0.426	0.9	0.559	0.3	1.76	8.821	10	0.82	0.648	0.408	DS	MG	12300	5930	6060	13	26.4	47.1	82	62.7	44.7	1	NA	0
30DRB	0.17	0.34	0.11	0.46	1.05	1.35	0.7	1.21	0.94	0.4	0.75	1.3	0.5	0.47	1.78	DR	BD	6100	6900	8800	26	36	35	57	45	50	1	0	0
30DSM	0.077	0.447	0.815	0.066	0.362	3.685	0.073	0.234	1.8	0.685	10	8.639	0.073	0.353	0.881	DS	MG	17090	9410	6490	8.9	28.7	43.4	83	59.8	41.5	1	NA	0
31DRB	0.16	0.1	0.15	0.15	0.14	1.28	0.57	1.42	3.55	0.9	8.34	3.1	0.18	0.28	5.14	DR	BD	16600	12100	6900	8	23	27	86	67	53	1	1	0
32DRB	0.7	0.08	0.07	0.52	0.32	0.28	0.62	0.31	0.15	6.88	10	8.38	0.24	1.57	6.32	DR	BD	5900	5900	4700	24	31	37	60	56	43	1	0	0
32DSM	0.34	0.229	1.576	0.163	0.362	1.456	2.747	1.168	3.898	3.813	7.045	10	0.179	0.207	0.652	DS	MG	7900	9590	7630	26.3	24.5	35.8	58.9	64.2	54.9	1	NA	0
32DSP	0.633	0.323	0.36	2.524	4.68	5.031	3.018	4.216	3.666	10	10	9.104	0.518	1.035	1.724	DS	PR	7350	4310	7410	19	52	29	79	41	35	1	0	0
33DRB	0.19	0.26	0.09	0.43	1.71	2.27	2.12	4.39	3.05	6.76	7.55	9.23	1.55	0.74	0.65	DR	BD	11000	6900	5100	14	46	43	77	41	48	1	0	0
33DSP	0.154	0.159	0.235	0.295	0.574	0.164	0.31	0.579	0.24	0.678	2.101	2.446	0.21	0.159	1.761	DS	PR	11600	8490	7240	13	16	22	77	73	59	1	NA	0
34DSM	0.126	0.159	0.799	0.22	0.256	2.466	0.289	0.322	2.912	10	6.183	8.911	0.148	0.225	0.366	DS	MG	11970	10410	6840	11.9	18.2	30	78	74.8	62.2	1	NA	0
35DSM	0.152	0.234	0.062	0.229	0.734	1.066	2.823	4.173	4.57	1.089	10	10	0.197	0.612	0.24	DS	MG	9680	5020	5240	19.8	44.0	49.4	66.4	41.8	35.1	1	NA	0
36DRB	0.09	0.07	0.04	0.14	0.14	0.26	0.14	0.19	0.26	5.01	0.57	0.16	0.15	0.35	0.31	DR	BD	12600	7500	7400	14	19	27	78	75	52	1	0	0
36DSM	0.229	0.243	0.498	0.284	0.269	1.438	0.248	0.26	0.42	6.223	4.252	8.965	0.216	0.265	0.581	DS	MG	16480	13250	9500	16.0	11.0	20.8	75	80	68.1	1	1	0
37DRB	0.47	0.45	0.12	0.59	1.27	1.41	0.46	1.53	1.56	1.24	3.08	10	0.55	6.43	10	DR	BD	6300	11100	14300	7	13	12	84	75	72	1	0	0
38DRB	0.17	0.3	0.13	0.67	0.86	0.02	1.02	0.75	0.24	0.84	3.6	2.77	0.72	1.83	4.05	DR	BD	7500	5800	4400	21	26	38	67	64	48	1	0	0
39DRB	0.36	0.16	0.09	0.39	0.16	0.08	0.44	0.19	0.07	1.67	0.59	10	0.36	0.33	0.15	DR	BD	10100	10500	6600	27	17	29	65	75	48	1	1	0
39DSP	0.142	0.106	0.087	0.241	0.198	0.696	0.256	0.262	0.666	10	10	10	0.117	0.095	0.275	DS	PR	17010	9360	4490	14	20	37	84	78	60	1	0	0
40DSM	1.696	0.3	0.141	2.166	0.496	5.986	1.661	0.648	8.209	3.498	1.92	10	1.534	0.451	1.392	DS	MG	5700	4930	3270	18	10.7	60	75	58.5	32	1	1	0
40DSP	0.162	0.103	0.207	1.57	3.023	10	1.098	2.962	10	0.553	1.856	1.86	0.159	0.162	0.532	DS	PR	8790	9870	4370	20	15	40	76	81	50	1	0	0
41DSM	0.091	0.265	0.569	0.095	0.313	0.587	0.117	0.3	0.575	3.81	0.698	5.286	0.099	0.327	0.534	DS	MG	16630	14010	8550	6.9	7.0	11.8	88	91	75.7	1	1	0
41DSP	0.136	0.128	0.168	1.042	1.738	3.564	0.673	2.517	5.374	10	8.254	10	0.192	0.162	0.626	DS	PR	6730	6510	4720	29	31	40	56	62	52	1	0	0
43DSM	0.58	0.327	0.318	1.69	3.746	0.77	5.5	4.629	5.446	10	10	10	1.2	1.459	3.243	DS	MG	5160	3220	2870	37.7	57.7	70	51	32.6	18	1	0	0
45DSM	0.188	0.072	0.221	0.176	0.107	0.336	0.645	0.3	0.694	10	10	9.302	0.525	0.137	0.282	DS	MG	6690	6360	4930	26.5	28.0	33.1	62.7	61.8	53.6	1	1	0
45DSP	0.225	0.101	0.156	10	3.564	10	10	4.053	6.628	4.86	4.098	0.948	0.311	1.248	0.729	DS	PR	5640	8180	5320	27	22	31	72	74	65	1	0	0
47DSM	0.27	0.094	0.149	10	2.343	0.909	10	3.927	2.149	10	8.459	9.894	0.322	0.146	0.262	DS	MG	5720	5000	4590	19.4	23	24.0	68.9	68.4	66.6	1	1	0
47DSP	0.54	0.067	0.442	0.73	0.442	3.663	1.25	0.229	5.54	3.98	6.575	10	0.64	0.087	1.027	DS	PR	19300	14350	5050	23	25	28	76	72	69	1	0	0
48DSM	0.291	0.232	2.786	2.104	9.78	0.403	2.303	10	3.028	10	10	10	0.336	0.395	0.534	DS	MG	11400	6970	4750	17.4	40.2	54	68.5	45.6	36	1	0	0
55DSM	0.522	0.043	0.108	5.197	7.242	0.827	9.952	6.98	0.567	10	10	10	10	0.483	0.195	DS	MG	3420	3240	4400	33.8	64.0	27.5	54.3	28	60.7	1	0	0
59DSM	0.101	0.01	0.031	0.115	0.074	0.498	0.92	0.016	0.604	10	10	10	0.185	0.185	0.152	DS	MG	13090	9390	9480	7.9	28.2	27.2	89	61.7	65.4	1	0	0
61DSM	0.244	0.014	0.035	0.653	1.677	0.453	1.16	2.891	0.477	10	10	10	0.247	0.243	0.702	DS	MG	5050	2550	3540	23.6	59.0	44.4	63.7	31	43.1	1	0	0
62DSM	0.23	0.02	0.035	4.7	0.034	0.154	1.316	0.013	0.106	9.102	10	10	0.329	0.256	0.309	DS	MG	8980	7470	5350	12.6	16.1	25.6	79.7	68.9	56	1	0	0
64DSM	1.132	0.187	0.224	1.189	0.273	0.942	1.219	0.325	1.406	1.347	1.069	10	1.272	0.47	2.187	DS	MG	12100	11600	5580	7	11	23.9	88	81	56	1	0	1
66DSM	0.163	0.569	0.154	0.443	2.108	0.583	1.442	3.635	0.874	7.305	0.01	10	0.139	0.48	0.235	DS	MG	10530	8290	5990	16.2	23.4	37.8	77.5	67.1	50.9	1	0	0
68DSM	0.093	0.055	0.022	1.67	0.925	0.306	0.996	0.767	0.313	10	10	10	0.436	0.596	0.625	DS	MG	5830	2890	4040	27.3	44.6	33.9	64.1	36.7	51	1	0	0
70DSM	0.671	0.089	0.022	5.74	0.168	0.14	1.162	0.212	0.143	1.267	4.459	4.213	0.867	0.125	0.132	DS	MG	17950	11600	7080	16	17.6	25.8	79	75	65.6	1	0	0
71DSM	0.264	0.363	0.049	0.301	1.918	1.687	1.582	2.142	1.659	10	6.527	8.759	0.195	0.221	0.113	DS	MG	9980	7140	7200	19.7	24.2	31.5	70.1	60.6	57.2	1	0	0
77DSM	0.264	0.199	0.039	0.284	0.241	0.065	0.274	0.189	0.053	0.656	9.281	5.512	0.33	0.329	0.473	DS	MG	9060	7050	3490	13.3	30.4	48.7	74.1	54.9	37.6	1	1	0
78DSM	0.153	0.038	1.424	1.092	1.762	10	1.127	5.582	10	2.447	4.542	10	0.42	0.088	0.264	DS	MG	5010	3820	3550	29.7	38.69	49.0	49.7	40.1	28	1	1	0
79DSM	0.38	0.11	0.55	1.01	5.477	3.315	0.867	0.586	2.87	2.417	3.49	4.06	0.365	0.143	0.255	DS	MG	9710	7560	3780	11.8	13.9	27.9	73	72	57.7	1	1	0
80DSM	0.153	0.113	0.128	1.047	0.434	2.877	0.777	0.606	2.487	1.75	5.739	1.275	0.199	0.148	0.098	DS	MG	8610	5800	10510	13.1	23.1	10.7	75.4	62.1	80.1	1	1	0
